# Supplementary material for: Effects of work conditions on provider mental well-being and quality of care: a mixed-methods intervention study in the emergency department
Source: Springer Nature journal article supplement (doi:10.1186/s12873-018-0218-x), 2019-01-03
Supplement: MOESM1 [file 16373496]

## Supplementary Tables S1 and S2

Table S1: Dates of data collection

| Day number | Date: Baseline | Date: Follow-up |
|------------|----------------|-----------------|
| 1          | 01.12.2015     | 02.12.2016      |
| 2          | 02.12.2015     | 06.12.2016      |
| 3          | 07.12.2015     | 07.12.2016      |
| 4          | 09.12.2015     | 08.12.2016      |
| 5          | 08.12.2015     | 12.12.2016      |
| 6          | 10.12.2015     | 14.12.2016      |
| 7          | 14.12.2015     | 16.12.2016      |
| 8          | 18.12.2015     | 18.12.2016      |
| 9          | 19.12.2015     | 20.12.2016      |
| 10         | 20.12.2015     | 22.12.2016      |
| 11         | 04.01.2016     | 09.01.2017      |
| 12         | 07.01.2016     | 11.01.2017      |
| 13         | 08.01.2016     | 13.01.2017      |
| 14         | 12.01.2016     | 17.01.2017      |
| 15         | 13.01.2016     | 19.01.2017      |
| 16         | 14.01.2016     | 21.01.2017      |
| 17         | 15.01.2016     | 23.01.2017      |
| 18         | 18.01.2016     | 25.01.2017      |
| 19         | 20.01.2016     | 27.01.2017      |
| 20         | 22.01.2016     | 30.01.2017      |

Table S2: Panel attrition

| Study outcomes                 | Full sample<br>T1 and T2<br>(n=41) | Dropouts<br>T1 not T2<br>(n=35) | Mean differences at<br>baseline (T1) |    |             | Full sample<br>T1 and T2<br>(n=41) | “Dropins”<br>T2 not T1<br>(n=32) | Mean differences at<br>follow-up (T2) |    |             |
|--------------------------------|------------------------------------|---------------------------------|--------------------------------------|----|-------------|------------------------------------|----------------------------------|---------------------------------------|----|-------------|
|                                | M (SD) T1                          | M (SD) T1                       | t                                    | df | p           | M (SD) T2                          | M (SD) T2                        | t                                     | df | p           |
| <i>Work system factors</i>     |                                    |                                 |                                      |    |             |                                    |                                  |                                       |    |             |
| Professional tenure            | 21.22<br>(11.30)                   | 13.06<br>(9.22)                 | -3.28                                | 68 | <b>.002</b> | 21.09<br>(12.02)                   | 11.41<br>(10.92)                 | -3.55                                 | 71 | <b>.001</b> |
| Patient stressors              | 4.10 (.63)                         | 4.03 (.79)                      | -.42                                 | 74 | .673        | 4.11 (.71)                         | 4.13 (.59)                       | .12                                   | 71 | .902        |
| Job control                    | 2.61 (.76)                         | 2.93 (.88)                      | 1.69                                 | 74 | .095        | 2.90 (.74)                         | 2.85 (.76)                       | -.30                                  | 70 | .763        |
| Participation<br>opportunities | 1.80 (.70)                         | 2.01 (.69)                      | 1.31                                 | 74 | .196        | 1.83 (.70)                         | 1.93 (.61)                       | .63                                   | 70 | .532        |
| Work overload                  | 4.37 (.61)                         | 4.07 (.83)                      | -1.81                                | 61 | .075        | 4.37 (.48)                         | 4.04 (.67)                       | -2.41                                 | 71 | <b>.018</b> |
| Personnel resources            | 1.90 (.71)                         | 2.13 (.63)                      | 1.45                                 | 74 | .150        | 1.76 (.75)                         | 1.90 (.72)                       | .78                                   | 70 | .441        |
| Information problems           | 3.20 (.79)                         | 3.15 (.75)                      | -.29                                 | 74 | .776        | 3.26 (.80)                         | 3.11 (.80)                       | -.77                                  | 71 | .444        |
| Uncertainty                    | 3.48 (.65)                         | 3.58 (.69)                      | .67                                  | 74 | .505        | 3.64 (.61)                         | 3.42 (.56)                       | -1.53                                 | 70 | .132        |
| Overtime (hours)               | 7.26<br>(4.78)                     | 9.84<br>(10.32)                 | 1.14                                 | 33 | .262        | 5.81<br>(5.10)                     | 7.84 (9.59)                      | .83                                   | 35 | .411        |
| Social support                 | 3.15 (.87)                         | 3.33<br>(1.05)                  | .83                                  | 74 | .410        | 2.88 (.89)                         | 3.20 (.98)                       | 1.48                                  | 71 | .144        |
| Supervisor feedback            | 2.02 (.90)                         | 2.46<br>(1.15)                  | 1.80                                 | 64 | .077        | 2.30 (.93)                         | 2.41 (.91)                       | .49                                   | 70 | .629        |
| <i>Provider well-being</i>     |                                    |                                 |                                      |    |             |                                    |                                  |                                       |    |             |
| Job satisfaction               | 4.35<br>(1.25)                     | 4.62<br>(1.48)                  | .84                                  | 72 | .402        | 3.79<br>(1.47)                     | 4.40 (1.45)                      | 1.70                                  | 67 | .093        |
| Turnover intentions            | 2.29<br>(1.01)                     | 2.06<br>(1.03)                  | -1.01                                | 74 | .317        | 2.72<br>(1.28)                     | 2.16 (1.14)                      | -1.96                                 | 71 | .054        |
| Emotional exhaustion           | 4.19 (.94)                         | 3.96<br>(1.19)                  | -.91                                 | 74 | .366        | 4.21<br>(1.03)                     | 3.88 (1.18)                      | -1.25                                 | 71 | .214        |
| Depersonalization              | 3.18<br>(1.23)                     | 3.03<br>(1.29)                  | -.53                                 | 74 | .600        | 3.54<br>(1.22)                     | 2.87 (.93)                       | -2.57                                 | 71 | <b>.012</b> |
| Depressive symptoms            | 1.95 (.74)                         | 1.90 (.74)                      | -.30                                 | 74 | .764        | 2.11 (.76)                         | 2.08 (.87)                       | -.15                                  | 70 | .880        |
| <i>Quality of care</i>         |                                    |                                 |                                      |    |             |                                    |                                  |                                       |    |             |
| Frequency of errors            | 1.98 (.12)                         | 1.69 (.52)                      | -2.02                                | 71 | .047        | 2.05 (.75)                         | 2.09 (.70)                       | .26                                   | 71 | .795        |
| Patient safety                 | 2.71 (.78)                         | 3.04 (.67)                      | 1.99                                 | 74 | .050        | 2.50 (.71)                         | 2.81 (.82)                       | 1.75                                  | 71 | .085        |

*Legend.* T1: baseline, T2: follow-up; M: mean, SD: standard deviation, t: t-test statistic, df: degrees of freedom, bolded if  $p < .05$ .
